# Supplementary material for: Spinal neurons require Islet1 for subtype-specific differentiation of electrical excitability
Source: PubMed Central journal article supplement (PMC4153448; doi:10.1186/1749-8104-9-19), 2014-08-22

*Tg(mnx1:gfp)*

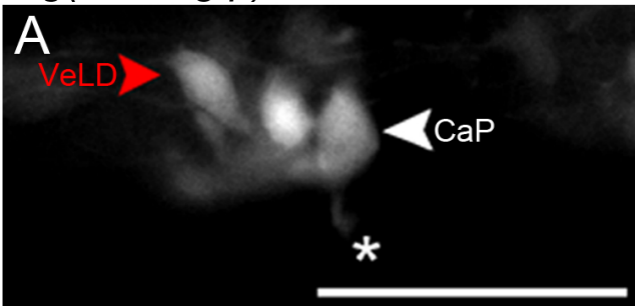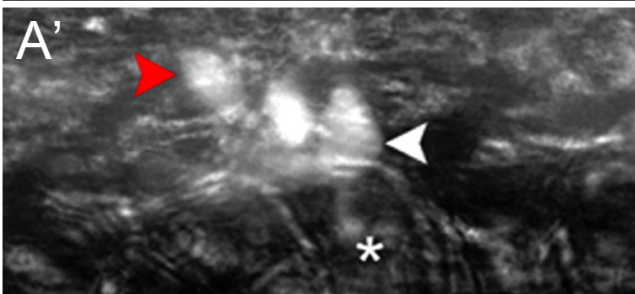

*Tg(8.1kGata1:eGFP)*

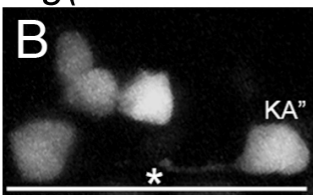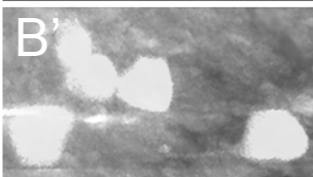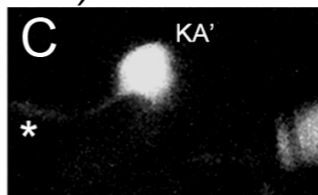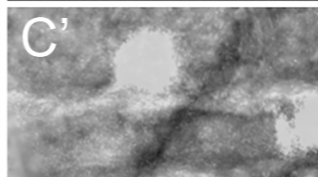

Supplement: 1749-8104-9-19-S1.pdf [file 1749-8104-9-19-S1.pdf]
