# Supplementary material for: Spinal neurons require Islet1 for subtype-specific differentiation of electrical excitability
Source: PubMed Central journal article supplement (PMC4153448; doi:10.1186/1749-8104-9-19), 2014-08-22

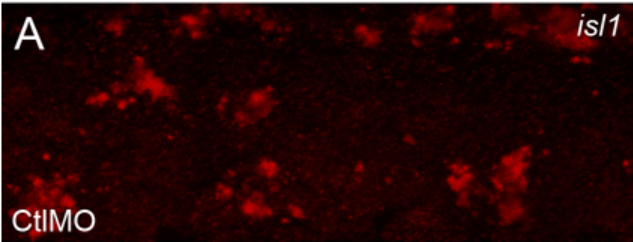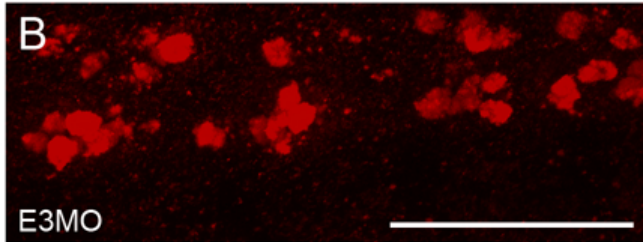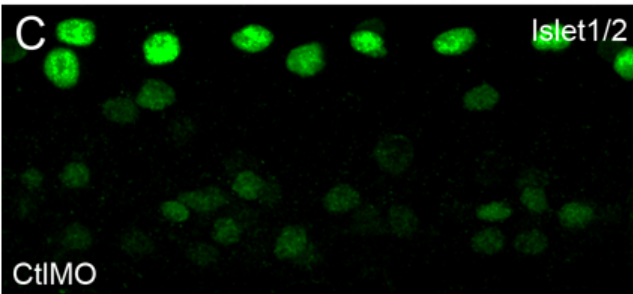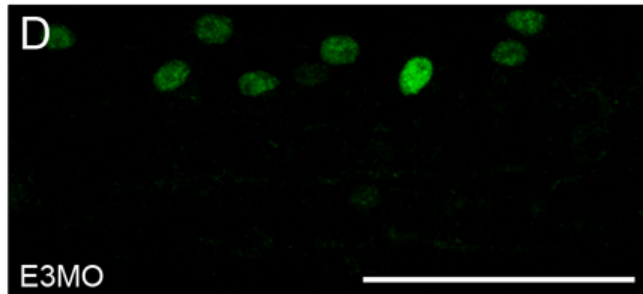

Supplement: 1749-8104-9-19-S2.pdf [file 1749-8104-9-19-S2.pdf]
